# Supplementary material for: Single Cell Transcriptomics on PRPF31 Retinal Organoids Reveal Early Müller Glial Activation and Progressive Photoreceptor Degeneration
Source: Research Square preprint supplement (doi:10.21203/rs.3.rs-6923352/v1), 2025-07-02
Supplement: Supplementary file 1 [file d658a34ea3775bbaf0197105.docx]

**Supplementary Data**


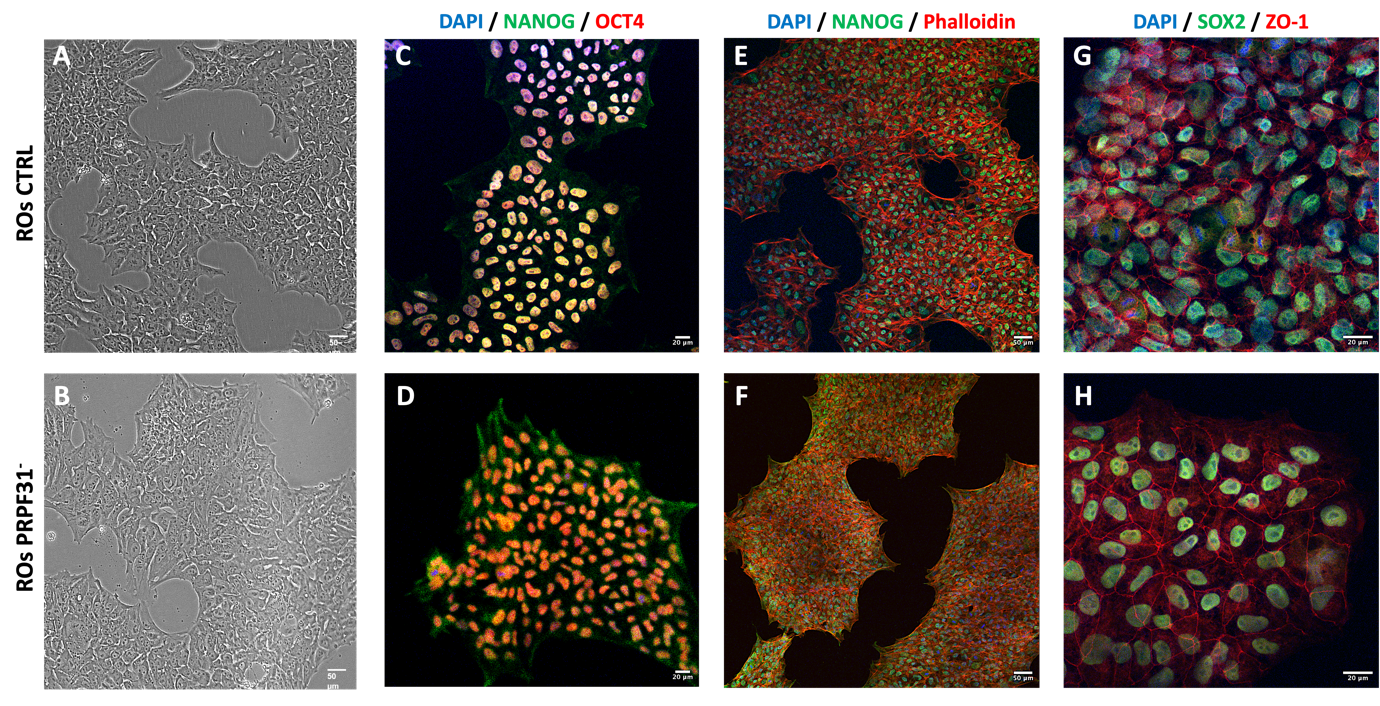
 **Figure S1 - Characterization of PRPF3 and control hiPSCs:** (A–B) Phase-contrast images showing similar undifferentiated morphology of control (A) and PRPF31-mutant (B) hiPSC colonies. (C–D) Immunofluorescence staining for pluripotency markers NANOG (green) and OCT4 (red) with DAPI nuclear counterstain (blue) confirms robust co-expression of core stemness factors in both control (C) and PRPF31-mutant (D) hiPSC lines. (E–F) Staining with NANOG (green) and Phalloidin (red; F-actin marker) reveals intact cytoskeletal organization in control (E) and mutant (F) colonies. (G–H) Expression of SOX2 (green) and ZO-1 (red) further supports maintenance of pluripotency and epithelial colony morphology in both control (G) and mutant (H) hiPSCs. Scale bar: 50 μm (A–B, E–F), 20 μm (C–D, G–H).

**
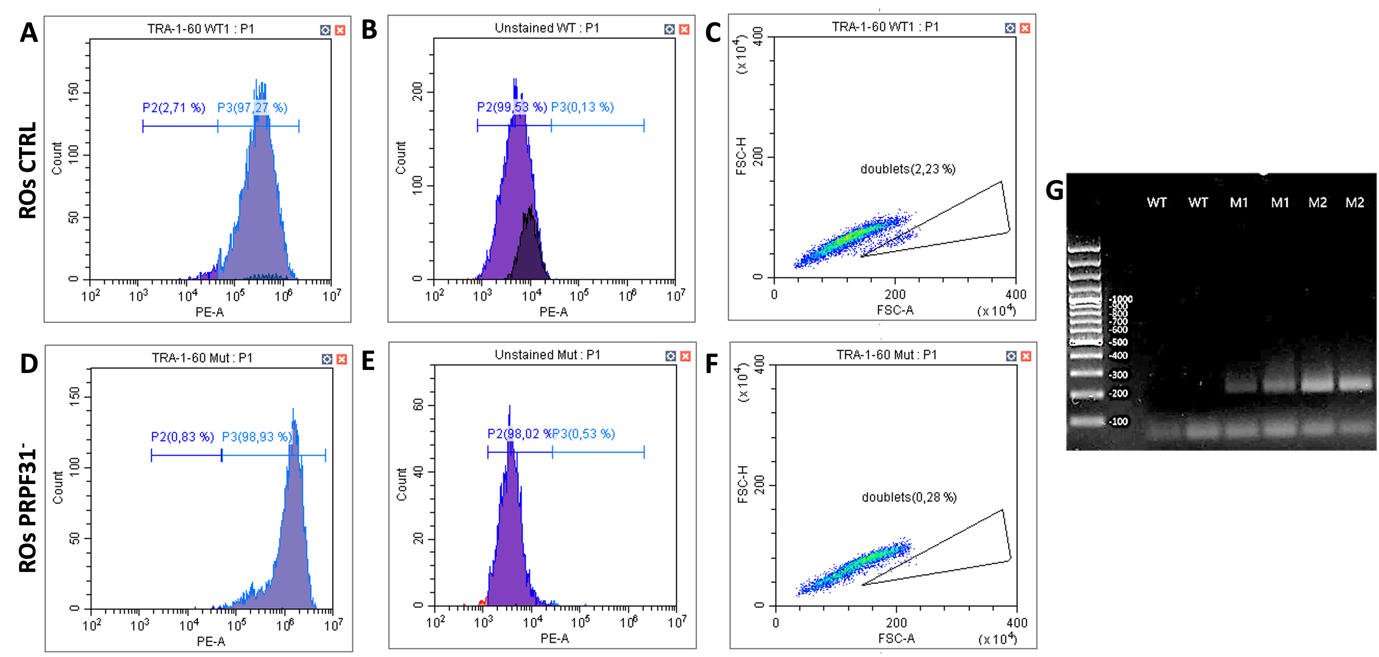
**

**Figure S2 - Flow cytometry of PRPF31 and control hiPSCs and PCR Amplification of PRPF31 Gene:** (A-F) Flow cytometry analysis of TRA-1-60 surface marker expression confirms high pluripotency marker expression in both control (A-C) and PRPF31 (D-F) hiPSC lines. Histogram showing ~97% TRA-1-60-positive cells in control (A); ~99% TRA-1-60-positive cells in PRPF31- line (D). (B;E) Unstained controls confirm specificity of TRA-1-60 staining. (C; F) Scatter plots show low percentage of doublets, ensuring high sample purity. (G) PCR-based amplification analysis reveals expected PRPF31 mutation in the PRPF31 hiPSCs (M1, M2) compared to control (WT) hiPSCs, confirming integrity of the patient-specific cell lines.

**Table1 - Antibodies**

**PRIMARY**

| **Antibody** | **Species** | **Concentration** | **Manifacturer** | **Catalog #** | **RRID** |
| --- | --- | --- | --- | --- | --- |
| Oct-4A | Rabbit | 1:400 | Cell Signaling Technology | 2840 | AB_2167691 |
| ZO-1 | Rabbit | 1:200 | Proteintech | 21773-1-AP | AB_10733242 |
| Nanog | Mouse | 1:200 | Santa Cruz Biotechnology | sc-293121 | AB_2665475 |
| Sox-2 | Mouse | 1:200 | Santa Cruz Biotechnology | sc-365823 | AB_10842165 |
| PAX6 | Rabbit | 1:100 | Proteintech | 12323-1-AP | AB_2159695 |
| TUJ1 (TUBB3) | Mouse | 1:500 | Proteintech | 66375-1-Ig | AB_2814998 |
| OTX2 | Mouse | 1:400 | Santa Cruz Biotechnology | sc-514195 | AB_2921699 |
| VSX2 | Rabbit | 1:400 | Proteintech | 25825-1-AP | AB_2880257 |
| POU4F2 | Rabbit | 1:200 | Proteintech | 55042-1-AP | AB_10888633 |
| Recoverin | Rabbit | 1:400 | Proteintech | 10073-1-AP | AB_2178005 |
| CRX | Mouse | 1:400 | Santa Cruz Biotechnology | sc-377138 | - |
| Arrestin C | Rabbit | 1:400 | Proteintech | 11100-2-AP | AB_2289959 |
| L/M Opsin | Rabbit | 1:200 | Kerafast | EDK101 | - |
| Rhodopsin | Mouse | 1:200 | Absolute Antibody | Ab00337-10.7 | - |
| Phalloidin 555 | Conjugated | 1:200 | Invitrogen | A30106 | - |

**SECONDARY**

| **Antibody** | **Concentration** | **Manifacturer** | **Catalog #** | **RRID** |
| --- | --- | --- | --- | --- |
| Alexa Fluor 488 Goat anti-rabbit | 1:1000 | Invitrogen | A-11034 | AB_2576217 |
| Alexa Fluor™ 488 Goat anti-Mouse | 1:1000 | Invitrogen | A-11029 | AB_2534088 |
| Alexa Fluor™ 546 Donkey anti-Rabbit | 1:1000 | Invitrogen | A-10040 | AB_2534016 |
| Alexa Fluor™ 555 Goat anti-Mouse | 1:1000 | Invitrogen | A-21424 | AB_141780 |
| Alexa Fluor™ 647 Goat anti-Mouse | 1:1000 | Invitrogen | A-21235 | AB_2535804 |
| Alexa Fluor™ 647 Donkey anti-Goat | 1:1000 | Invitrogen | A32849 | AB_2762840 |
| CoraLite® Plus 750-Goat Anti-Mouse | 1:1000 | Proteintech | RGAM006 | AB_3073504 |

**Table2 - Primers**

| GAPDH | Forward ( F ) | CTGGTAAAGTGGATATTGTTGCCAT |
| --- | --- | --- |
| Reverse ( R ) | TGGAATCATATTGGAACATGTAAACC |
| OPN1MW | Forward ( F ) | GAACCAGGTCTATGGCTACTTCG |
| Reverse ( R ) | TCTCACATTGCCAAAGGGCTT |
| CRX | Forward ( F ) | TCCAGGGTTCAGGTTTGGTT |
| Reverse ( R ) | CATCTGTGGAGGGTCTTGGG |
| RECOVERIN | Forward ( F ) | TCTACGACGTGGACGGTAACG |
| Reverse ( R ) | CGTCCTCGGGAGTGATCATT |
| RHODOPSIN | Forward ( F ) | GGGAGAACCATGCCATCAT |
| Reverse ( R ) | TCGTCTCCGTCTTGGA |
| ARR3 | Forward ( F ) | CCCAGAGCTTTGCAGTAACC |
| Reverse ( R ) | CACAGGACACCATCAGGTTG |
